# Supplementary material for: High-throughput enrichment of functional disulfide-rich peptides by droplet microfluidics
Source: Royal Society of Chemistry journal article supplement (doi:10.1039/d5lc00261c), 2025-01-01
Supplement: d5lc00261c1.pdf [file d5lc00261c1.pdf]

## SUPPLEMENTARY INFORMATION

### **High-throughput enrichment of functional disulfide-rich peptides by droplet microfluidics**

*Jing Xie<sup>1</sup>, Kuok Yap<sup>1,2</sup>, Simon J. de Veer<sup>1,2</sup>, Selvakumar Edwardraja<sup>3</sup>, Thomas Durek<sup>1,2</sup>, Matt Trau<sup>3</sup>, David J. Craik<sup>1,2</sup>, Conan K. Wang<sup>1,4\*</sup>*

<sup>1</sup> Institute for Molecular Bioscience, The University of Queensland, Brisbane, Queensland, Australia

<sup>2</sup> Australian Research Council Center of Excellence for Innovations in Peptide and Protein Science, The University of Queensland, Brisbane, Queensland, Australia

<sup>3</sup> Center for Personalized Nanomedicine, Australian Institute for Bioengineering and Nanotechnology, The University of Queensland, Brisbane, Queensland, Australia.

<sup>4</sup> ARC Research Hub for Advanced Manufacture of Targeted Radiopharmaceuticals, The University of Queensland, Brisbane, Australia.

\*Correspondence: [c.wang@imb.uq.edu.au](mailto:c.wang@imb.uq.edu.au) (Dr Conan Wang)

## Table of Contents

|                                |                                                                                                     | <b>Page</b> |
|--------------------------------|-----------------------------------------------------------------------------------------------------|-------------|
| <b>Fig. S1</b>                 | Determination of the concentration of linear MCoTI-II in spent media                                | S1          |
| <b>Fig. S2</b>                 | RP-HPLC analysis of purified linear MCoTI-II detected via UV absorption at 214 nm                   | S2          |
| <b>Fig. S3</b>                 | RP-HPLC analysis of purified cyclic MCoTI-II via UV absorption at 214 nm                            | S2          |
| <b>Fig. S4</b>                 | Flow cytometry analysis of eight clones expressing reporter tags for protease cleavage              | S3          |
| <b>Fig. S5</b>                 | Trypsin proteolysis reactions in tubes                                                              | S4          |
| <b>Fig. S6</b>                 | Flow cytometry analysis of yeast cells incubated at different temperatures                          | S5          |
| <b>Fig. S7</b>                 | Layout of the microfluidic device                                                                   | S6          |
| <b>Fig. S8</b>                 | The predicted probability of droplets containing different numbers of yeast cells                   | S6          |
| <b>Fig. S9</b>                 | Yeast secretory expression of four of the most enriched peptides from the fourth round of screening | S7          |
| <b>Fig. S10</b>                | Inhibitory activities of four enriched peptides                                                     | S8          |
| <b>Fig. S11</b>                | MALDI analysis of MCoAEP2 stability and efficiency                                                  | S9          |
| <b>Supplementary Table 1</b>   | Medium compositions                                                                                 | S10         |
| <b>Supplementary Table 2</b>   | Primers for MCoTI-II library generation (5' to 3')                                                  | S11         |
| <b>Supplementary Table 3</b>   | Primers for NGS library preparation                                                                 | S11         |
| <b>Supplementary Note</b>      | Amino acid and DNA sequences used in this work                                                      | S12         |
| <b>Supplementary Reference</b> |                                                                                                     | S17         |

**A**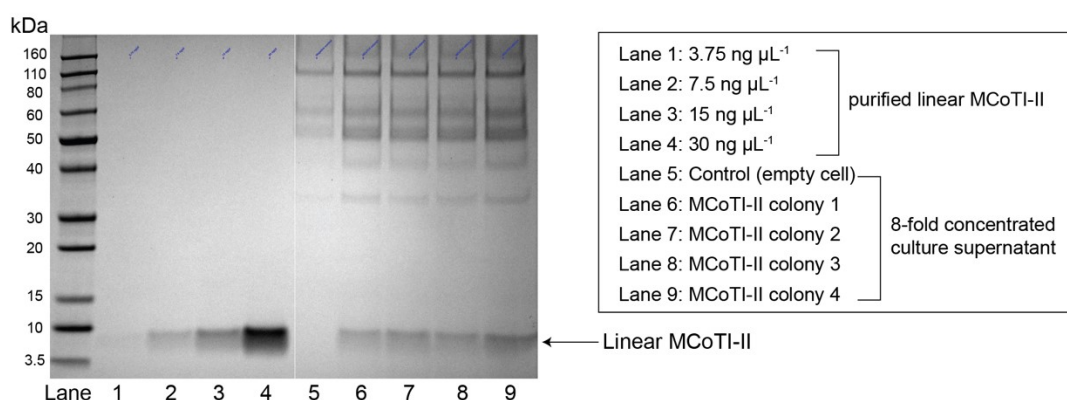**B**

| Lane | Band No. | Band Label | Mol. Wt. (KDa) | Relative Front | Adj. Volume (Int) | Volume (Int) | Abs. Quant. | Rel. Quant. | Band % | Lane %    |
|------|----------|------------|----------------|----------------|-------------------|--------------|-------------|-------------|--------|-----------|
| 1    | 1        |            | N/A            | 0.924617       | 243746            | 4870212      | N/A         | N/A         | 100    | 5.001866  |
| 2    | 1        |            | N/A            | 0.919717       | 1069144           | 6661820      | N/A         | N/A         | 100    | 14.020318 |
| 3    | 1        |            | N/A            | 0.91716        | 2484861           | 8718574      | N/A         | N/A         | 100    | 32.001709 |
| 4    | 1        |            | N/A            | 0.916963       | 6134952           | 12791529     | N/A         | N/A         | 100    | 61.718641 |
| 5    | 1        |            | N/A            | 0.927467       | 20758             | 183505       | N/A         | N/A         | 100    | 0.656937  |
| 6    | 1        |            | N/A            | 0.922527       | 973486            | 5631410      | N/A         | N/A         | 100    | 15.697303 |
| 7    | 1        |            | N/A            | 0.928315       | 1031587           | 5930796      | N/A         | N/A         | 100    | 17.462416 |
| 8    | 1        |            | N/A            | 0.934211       | 676882            | 6248693      | N/A         | N/A         | 100    | 14.312217 |
| 9    | 1        |            | N/A            | 0.943645       | 744399            | 6676479      | N/A         | N/A         | 100    | 14.116716 |

**C**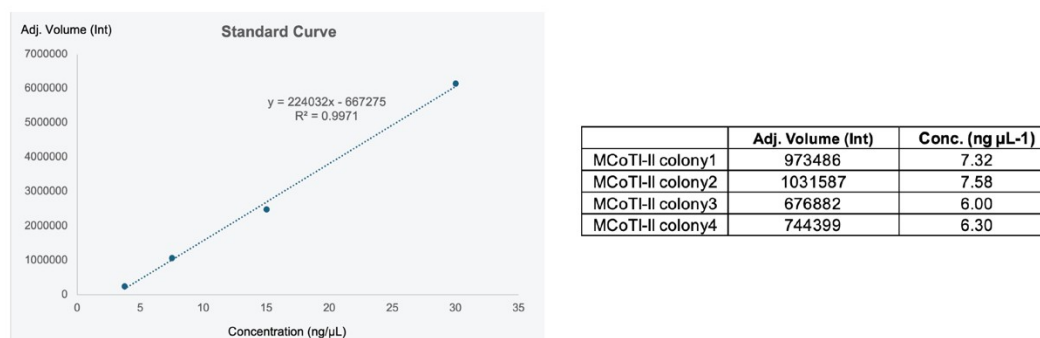

**Fig. S1** Determination of the concentration of linear MCoTI-II in spent media. (A) SDS-PAGE analysis of HPLC-purified recombinant linear MCoTI-II and concentrated culture supernatant from four single colonies (~8-fold concentrated by Amicon 3K). (B) Protein gel was imaged using a Bio-Rad Gel Doc and analyzed by the Bio-Rad Image Lab software. (C) Standard curve and calculated concentration of linear MCoTI-II in concentrated supernatant.

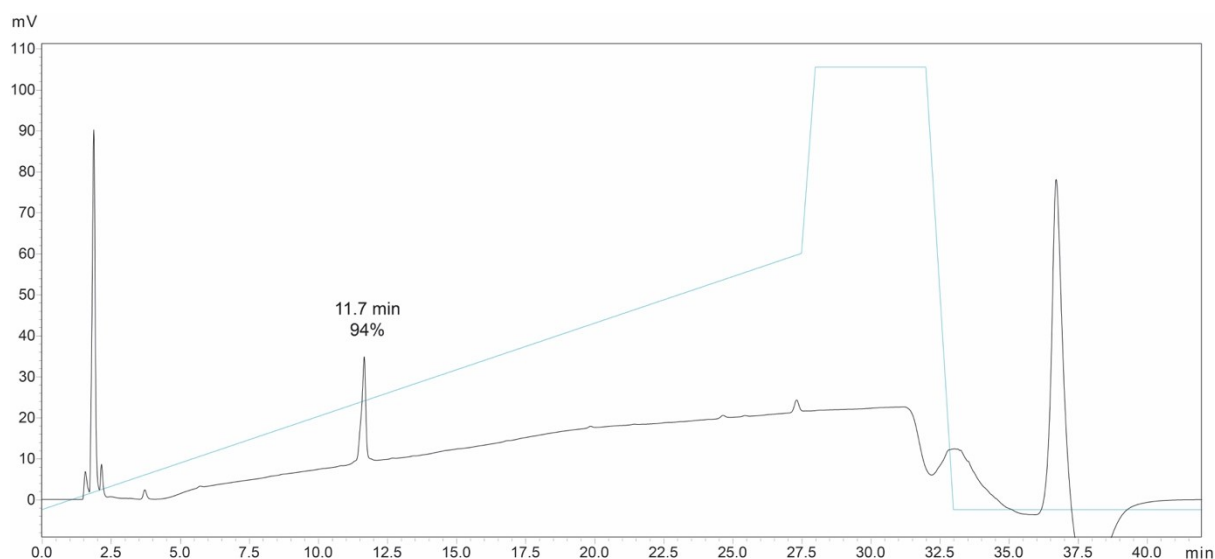

**Fig. S2** RP-HPLC analysis of purified linear MCoTI-II detected via UV absorption at 214 nm. Analysis was carried out with a Phenomenex Jupiter C18 column ( $150 \times 2$  mm,  $5 \mu\text{m}$ ,  $300 \text{ \AA}$ ) at a flow rate of  $0.3 \text{ mL min}^{-1}$  and using a linear gradient of 5–60% buffer B (90% acetonitrile, 0.05% trifluoroacetic acid in water) in buffer A (0.05% trifluoroacetic acid in water) over 42 min.

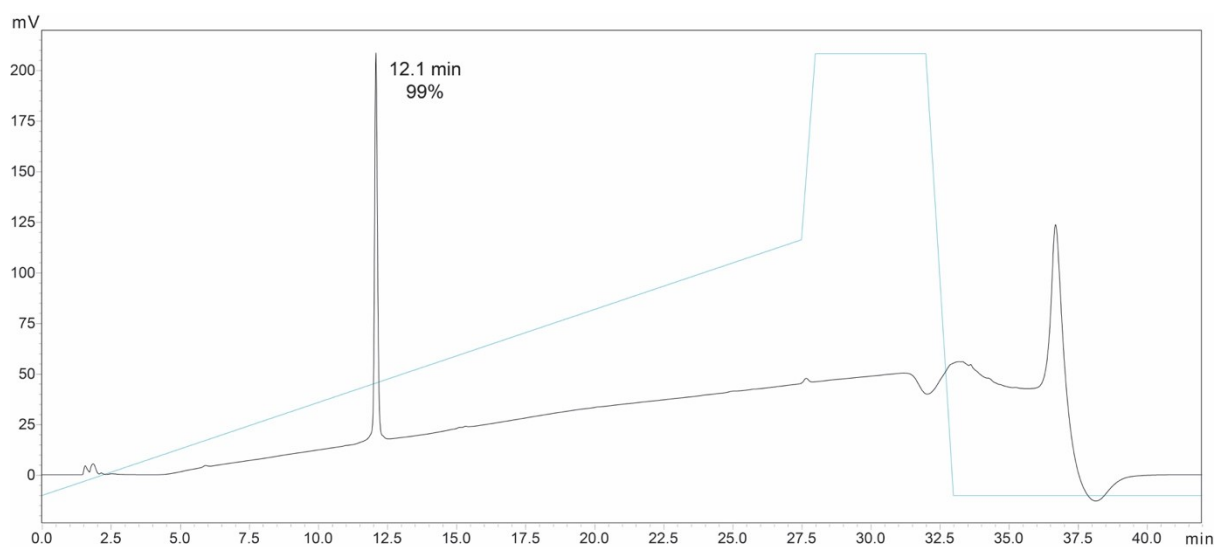

**Fig. S3** RP-HPLC analysis of purified cyclic MCoTI-II via UV absorption at 214 nm. Analysis was carried out with a Phenomenex Jupiter C18 column ( $150 \times 2$  mm,  $5 \mu\text{m}$ ,  $300 \text{ \AA}$ ) at a flow rate of  $0.3 \text{ mL min}^{-1}$  and using a linear gradient of 5–60% buffer B (90% acetonitrile, 0.05% trifluoroacetic acid in water) in buffer A (0.05% trifluoroacetic acid in water) over 42 min.

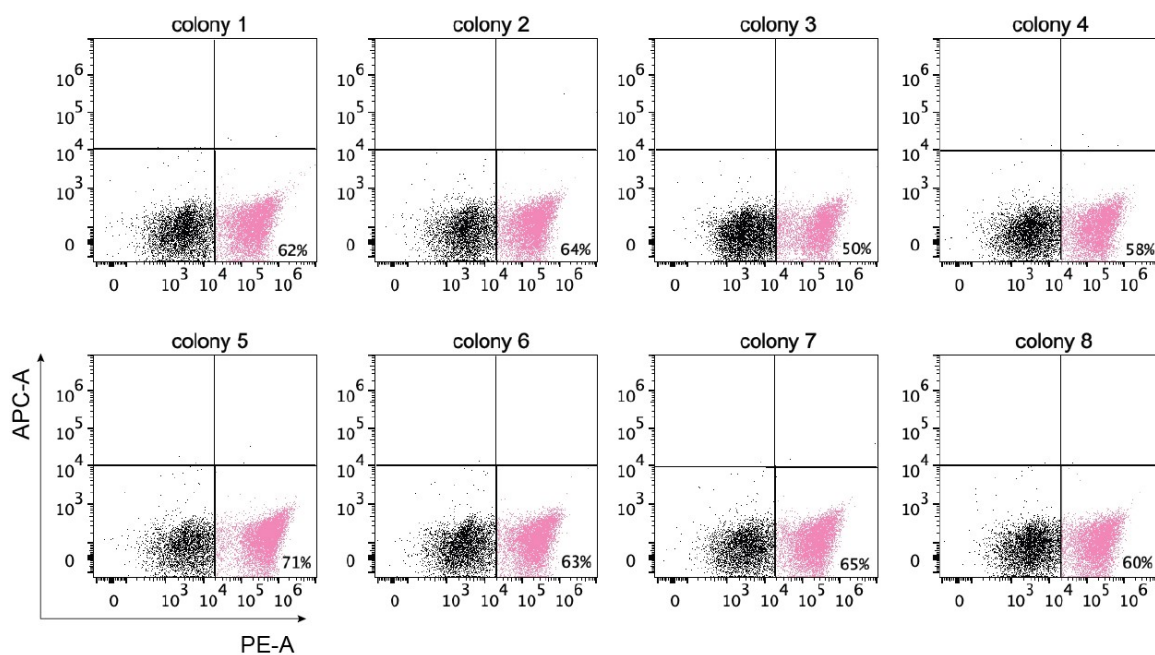

**Fig. S4** Flow cytometry analysis of eight clones expressing reporter tags for protease cleavage. Eight transformants were picked from the selection plate, cultured in the liquid medium, and stained with anti-HA-PE before CytoFLEX analysis. Percentages of PE-active cells are shown in each dot plot.

**A**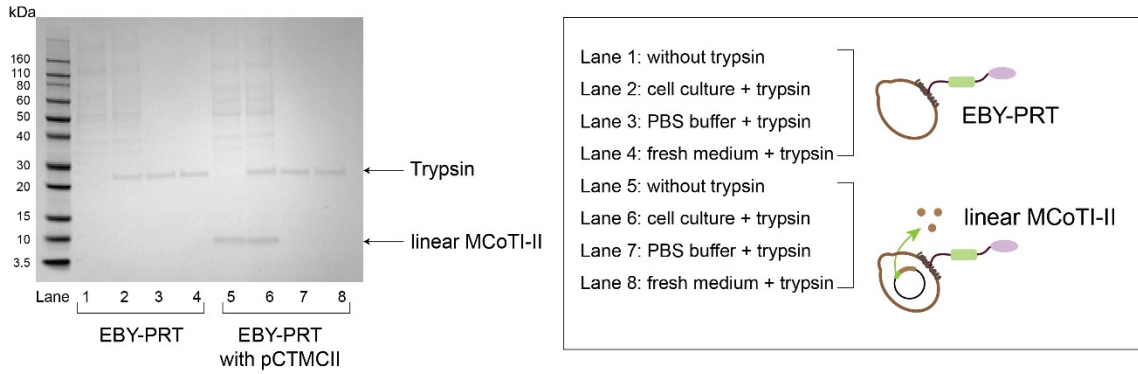**B**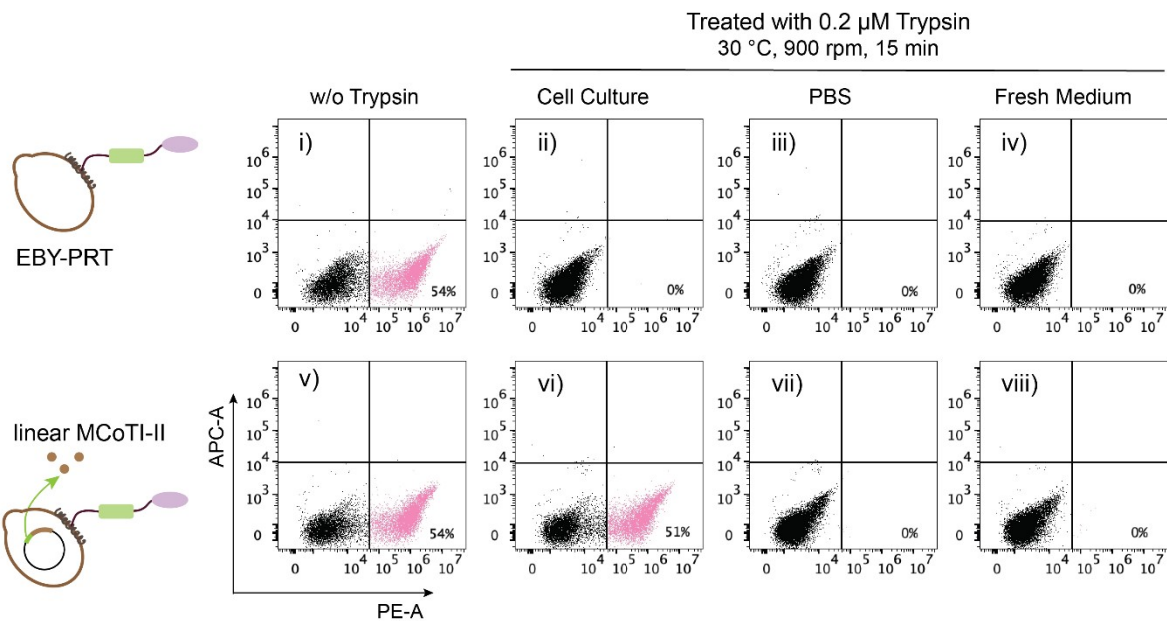

**Fig. S5** Trypsin proteolysis reactions in tubes. (A) SDS-PAGE analysis of trypsin proteolysis reactions. Yeast cells (empty EBYPRT and transformed with pCTMCII) in different conditions (original cell culture/resuspended in PBS buffer/in fresh medium) were treated without or with 0.2  $\mu$ M trypsin and incubated at 30  $^{\circ}$ C for 15 min with shaking at 900 rpm. Twenty microliters of reaction supernatant were used for analysis. (B) Flow cytometry dot plots of yeast cells after staining with anti-HA-PE. First line: EBYPRT under different conditions: i) cell culture without trypsin treatment; ii) cell culture treated with 0.2  $\mu$ M trypsin; iii) cells collected with culture supernatant removed and then resuspended in PBS buffer or iv) fresh culture medium and then treated with 0.2  $\mu$ M trypsin. Second line: EBYPRT transformed with pCTMCII under different conditions v) vi) vii) viii) corresponding to i) ii) iii) iv), respectively.

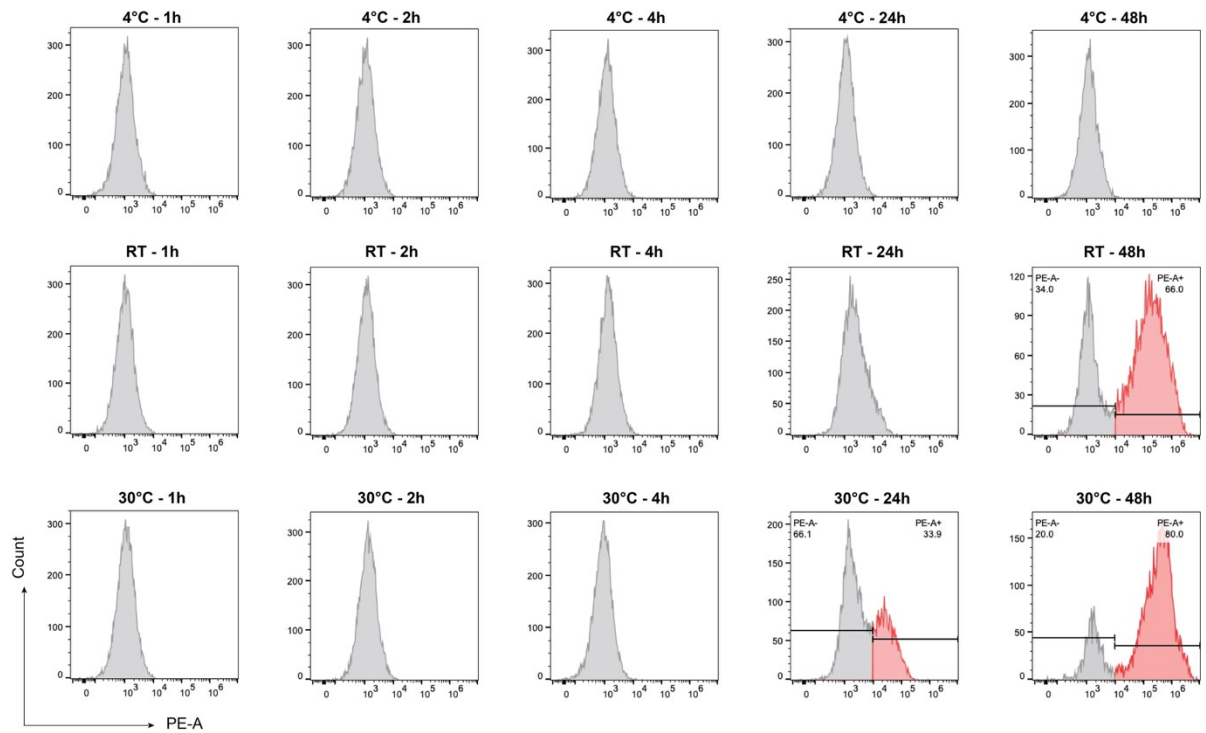

**Fig. S6** Flow cytometry analysis of yeast cells (EBY-PRT transformed with pCTMCII) incubated at different temperatures (4°C, room temperature (RT), and 30°C). Yeast cells were induced in SDGAA medium (pH 6.85) supplemented with 0.1  $\mu$ M trypsin, and collected at different time points post-induction (1 h, 2 h, 4 h, 24 h, and 48 h). Yeast cells were labeled with anti-HA-PE and analyzed by CytoFLEX.

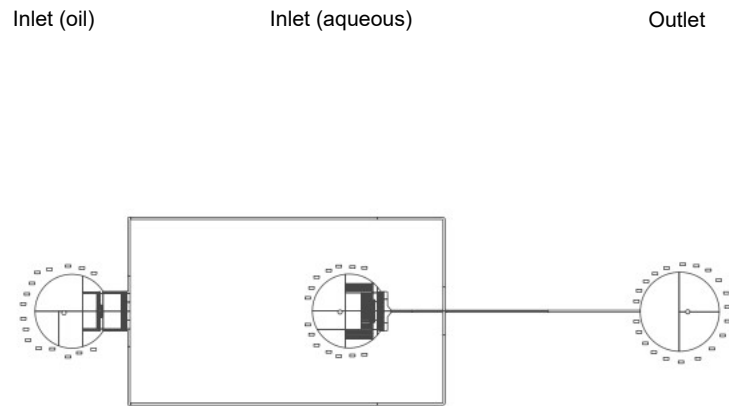

**Fig. S7** Layout of the microfluidic device. The device consists of two inlets: oil (PicoSurf) and aqueous phase (cells in media). Width and height of the channel = 50  $\mu\text{m}$ . Water-in-oil droplets are formed at the junction, flow out of the outlet, and can be collected in an Eppendorf or Falcon tube.



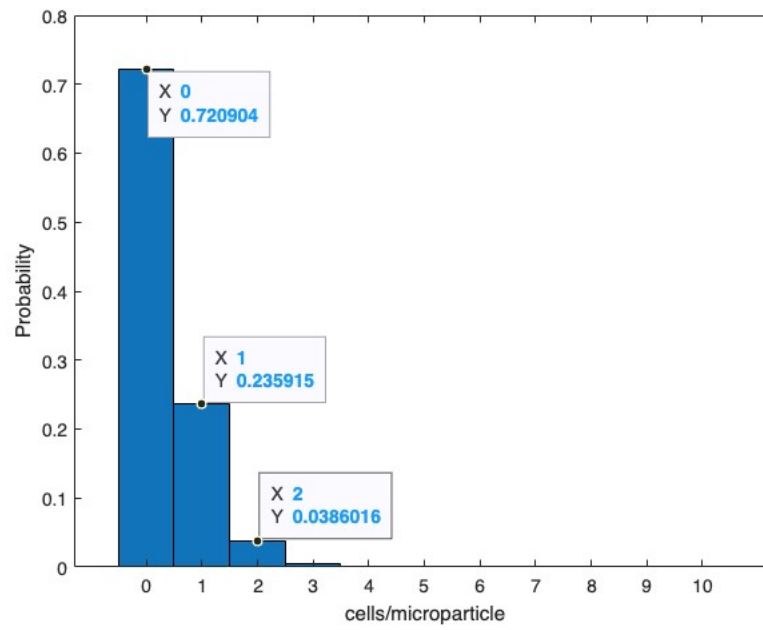

**Fig. S8** The predicted probability of droplets containing different numbers of yeast cells.

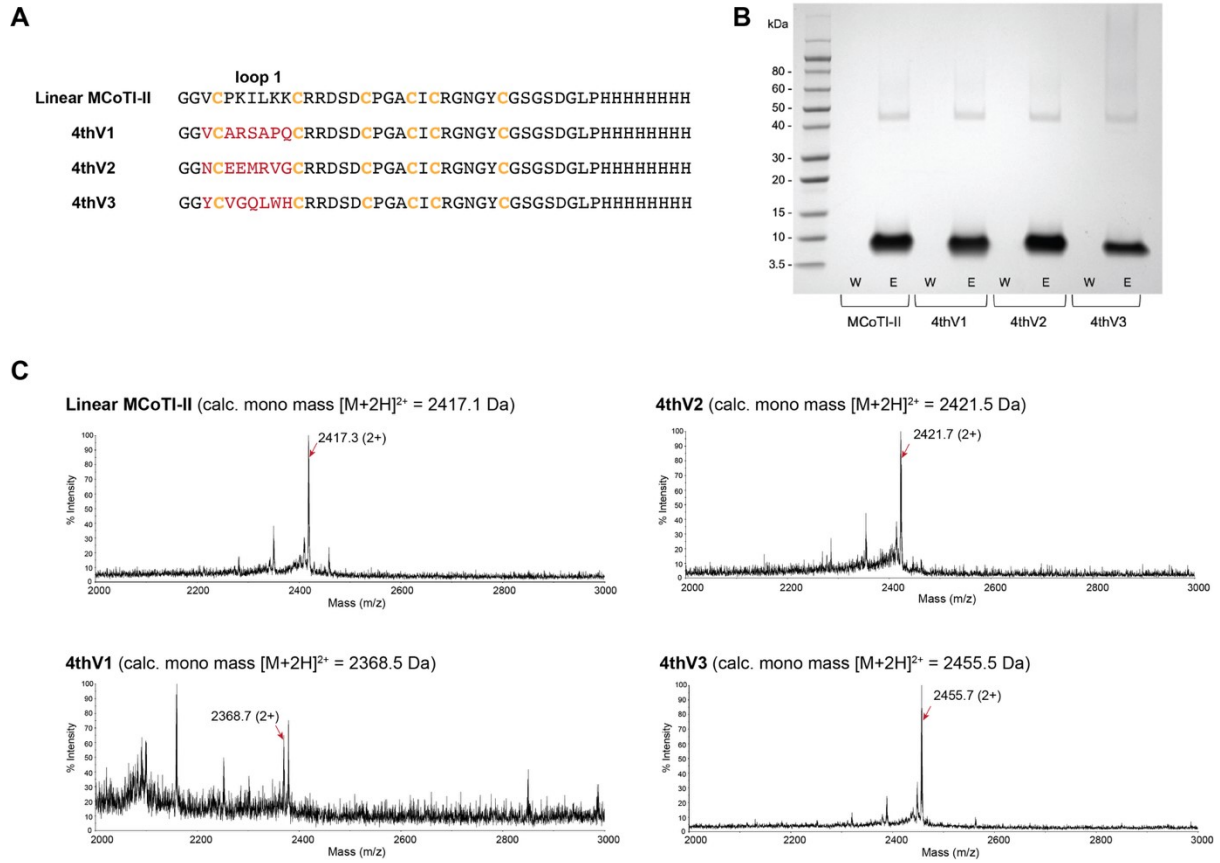

**Fig. S9** Yeast secretory expression of four of the most enriched peptides from the fourth round of screening, including native MCoTI-II, 4thV1, 4thV2, and 4thV3. (A) Amino acid sequences of these four peptides. (B) SDS-PAGE analysis of IMAC fractions (W: washed fraction; E: eluted fraction) purified from 50 mL of culture supernatant. (C) MALDI-TOF-MS analysis of the eluted fractions. Observed peptide mass peaks are indicated by red arrows. All reported masses are in Dalton.

**A****Inhibitory Activity Test**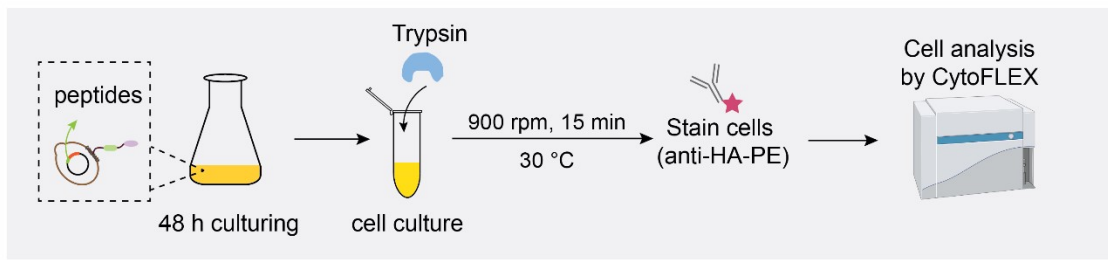**B**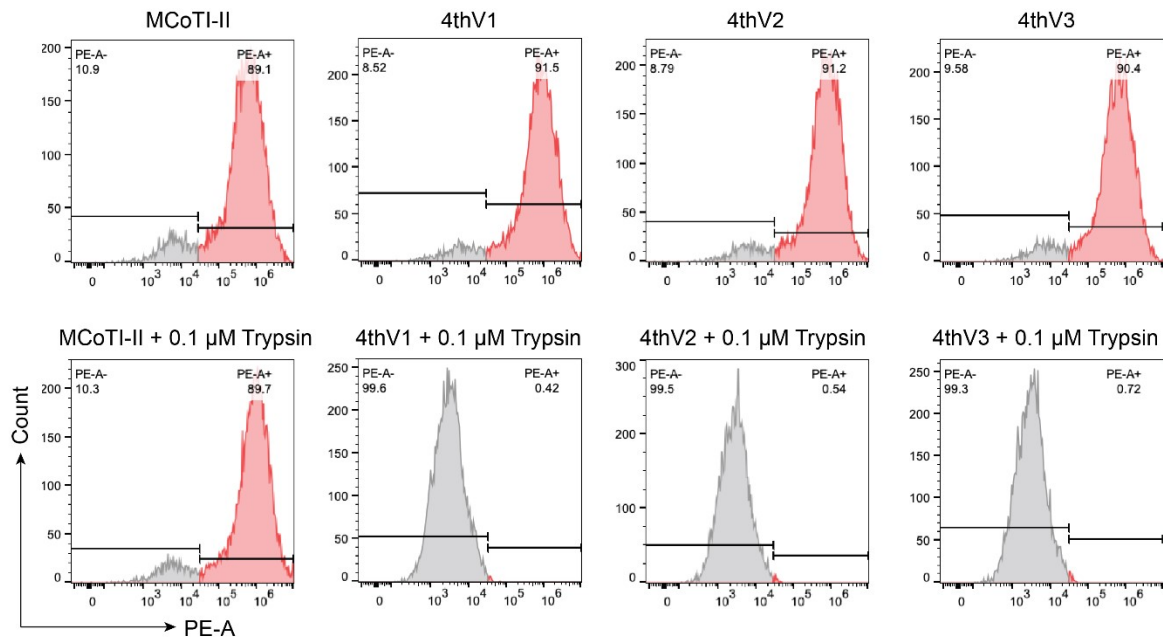

**Fig. S10** Inhibitory activity test of the four enriched peptides from the fourth round of selection. (A) Illustration of the in-tube test. Yeast cells were induced and cultured for 48 h, then split in EP tubes and treated with trypsin (final concentration 0.1 μM) for 15 min before being stained with anti-HA-PE and analyzed using a CytoFLEX cytometer. (B) Histogram of flow cytometry analysis of yeast cells secreting different peptides (MCoTI-II, 4thV1, 4thV2, and 4thV3) under two conditions: without trypsin treatment and with trypsin treatment.

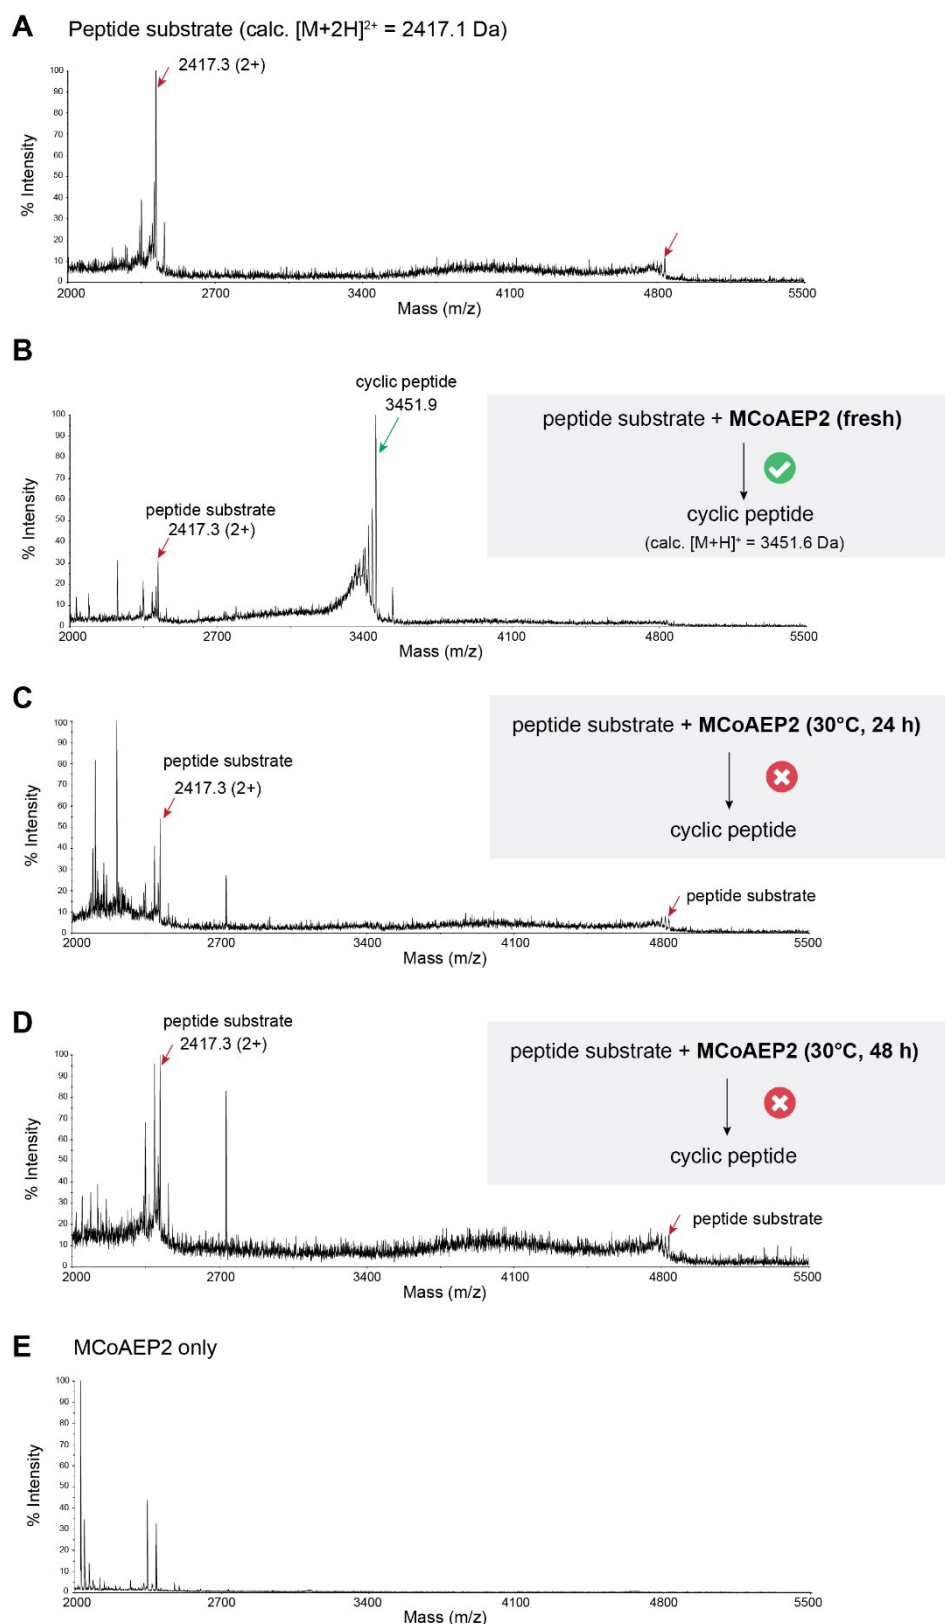

**Fig. S11** MALDI analysis of MCoAEP2 efficiency on the cyclization of peptide substrate. Peptide substrate was incubated with MCoAEP2 in pH 6 buffer for 4 h at 30°C and then quenched with 10%(v/v) formic acid before MALDI-TOF-MS analysis.

**Supplementary Table 1.** Medium compositions

|                 |                                                                                                                                                                                                                                                                                                                                                                                               |
|-----------------|-----------------------------------------------------------------------------------------------------------------------------------------------------------------------------------------------------------------------------------------------------------------------------------------------------------------------------------------------------------------------------------------------|
| SDCAA           | <p>For one liter of medium:</p> <ul style="list-style-type: none"><li>- 20 g D-glucose (dextrose)</li><li>- 6.7 g yeast nitrogen base</li><li>- 1.92 g yeast synthetic drop-out medium supplements, without tryptophan (Merk, Y1876)</li></ul>                                                                                                                                                |
| SDGAA (pH 6.85) | <p>For one liter of medium:</p> <ul style="list-style-type: none"><li>- 20 g D-(+)-galactose</li><li>- 6.7 g yeast nitrogen base</li><li>- 1.92 g yeast synthetic drop-out medium supplements, without tryptophan (Merk, Y1876)</li></ul> <p>pH is adjusted using 1M Na<sub>2</sub>HPO<sub>4</sub> and 1M citric acid following the recipes detailed in the referenced study.<sup>1</sup></p> |

**Supplementary Table 2.** Primers for MCoTI-II library generation (5' to 3')

|                                 |                                                                                                        |
|---------------------------------|--------------------------------------------------------------------------------------------------------|
| Linear-library-F                | ttgctgctaaagaagaaggggtatctctcgagaagagaggtgggNNKtgcNNKNNKN<br>NKNNKNNKNNKttaggagggattctgattg            |
| Linear-library-R                | CGTCTGAACCTGATCCACAGTAGCCATTTCCCCTGCAAATG<br>CAGGCGCCAGGGCAATCAGAATCCCTCCTACATTTCTT                    |
| 2 <sup>nd</sup> Amplification-F | gggatttcgatgttgctgtttgccattttcaacagcacaaataacgggtattgtttataaataactact<br>attgccagcattgctgctaaagaagaagg |
| 2 <sup>nd</sup> Amplification-R | tgacagcgtagtctggaacgctgtagggtagctacattcaatcggtcagtgatggatgatggg<br>ggatgatgtggaagtcgctggaacctgatccac   |

Two runs of PCR generated the inset DNA encoding MCoTI-II library. The first run used the primer pair of 'Linear-library-F' and 'Linear-library-R', while the second run used the primer pair of '2<sup>nd</sup> Amplification-F' and '2<sup>nd</sup> Amplification-R'.

**Supplementary Table 3.** Primers for NGS library preparation

|                     |                                                                 |
|---------------------|-----------------------------------------------------------------|
| Nextera Overhang -F | ACACTCTTTCCCTACACGACGCTCTTCCGATCTGTATCTC<br>TCGAGAAGAGAGGTG     |
| Nextera Overhang -R | GTGACTGGAGTTCAGACGTGTGCTCTTCCGATCTgtcgtagg<br>gtatctacattcaatcg |
| IndexAddition_F     | AATGATACGGCGACCAACGAGATCTACAC(index5)ACAC<br>TCTTTCCCTACACGAC   |
| IndexAddition_R     | CAAGCAGAAGACGGCATACGAGAT(index7)GTGACTGGA<br>GTTTCAGACGTGT      |

**Supplementary Note.** Amino acid and DNA sequences used in this work.

**1. pCTMCII plasmid (pCTCON2 backbone)**

- $\alpha$ -mating factor secretion signal peptide in green
- MCoTI-II in orange
- Histag in blue

>CDS (amino acid sequence)

MRFPSIFTAVLFAASSALAAPVNTTTEDETAQIPAEAVIGYSDLEGDFDVAVLPFNSTNNG  
LLFINTTIIASIAAKEEGVSLEKRGGVCPKILKKRRDSDCPGACICRGNGYCGSGSDGLPHH  
HHHHHH\*

>5' to 3' DNA sequence

atgagatttccttcaatTTTTactgctgttttattcgcagcatcctccgcattagctgctcc  
agtcaacactacaacagaagatgaaacggcacaaattccggctgaagctgtcatcggttact  
cagatttagaaggggatttcgatgttgctgttttgccattttccaacagcacaaataacggg  
ttattgtttataaatactactattgccagcattgctgctaaagaagaaggggtatctctcga  
gaagagagggtggtgtgtgccccaaaatattgaagaaatgtaggagggtattctgattgcctg  
gcgctgcatttgcaggggaaatggctactgtggatcaggttcagacggacttccacatcac  
caccatcatcaccatcactga

## 2. pCT4thV1 plasmid (pCTCON2 backbone)

- $\alpha$ -mating factor secretion signal peptide in green
- 4thV1 in orange
- Histag in blue

>CDS (amino acid sequence)

MRFPSIFTAVLFAASSALAAPVNTTTEDETAQIPAEAVIGYSDLEGDFDVAVLPPFSNSTNNG  
LLFINTTIIASIAAKEEGVSLEKRGGVCARSAPQCRRSDCPGACICRGNGYCGSGSDGLPHH  
HHHHHH\*

>5' to 3' DNA sequence

atgagatttccttcaatTTTTactgctgttttattcgagcatcctccgcattagctgctcc  
agtcaacactacaacagaagatgaaacggcacaaattccggctgaagctgtcatcggttact  
cagatttagaaggggatttcgatgttgctgttttgccattttccaacagcacaaataacggg  
ttattgtttataaataactactattgccagcattgctgctaagaagaaggggtatctctcga  
gaagagagggtggtGTTTGCGCGCGGTCGGCGCCTCAGtgtaggagggattctgattgccctg  
gcgcctgcatttgcaggggaaatggctactgtggatcagggttcagacggacttccacatcac  
caccatcatcaccatcactga



### 3. pCT4thV2 plasmid (pCTCON2 backbone)

- $\alpha$ -mating factor secretion signal peptide in green
- 4thV2 in orange
- Histag in blue

>CDS (amino acid sequence)

MRFPSIFTAVLFAASSALAAPVNTTTEDETAQIPAEAVIGYSDLEGDFDVAVLPPFSNSTNNG  
LLFINTTIIASIAAKEEGVSLEKRGGNCEEMRVGCRRDSDCPGACICRGNGYCGSGSDGLPHH  
HHHHHH\*

>5' to 3' DNA sequence

atgagatttccttcaatTTTTactgctgttttattcgcagcatcctccgcattagctgctcc  
agtcaacactacaacagaagatgaaacggcacaaattccggctgaagctgtcatcggttact  
cagatttagaaggggatttcgatgttgctgttttgccattttccaacagcacaaataacggg  
ttattgtttataaataactactattgccagcattgctgctaagaagaaggggtatctctcga  
gaagagagggtggtAATTGCGAGGAGATGCGGGTTGGGtgtaggagggattctgattgccctg  
gcgcctgcatttgcaggggaaatggctactgtggatcagggttcagacggacttccacatcac  
caccatcatcaccatcactga

#### 4. pCT4thV3 plasmid (pCTCON2 backbone)

- $\alpha$ -mating factor secretion signal peptide in green
- 4thV3 in orange
- Histag in blue

>CDS (amino acid sequence)

MRFPSIFTAVLFAASSALAAPVNTTTEDETAQIPAEAVIGYSDLEGDFDVAVLPPFSNSTNNG  
LLFINTTIIASIAAKEEGVSLEKRGGYCVGQLWHCRRDSDCPGACICRGNGYCGSGSDGLPHH  
HHHHHH\*

>5' to 3' DNA sequence

atgagatttccttcaatTTTTactgctgttttattcgcagcatcctccgcattagctgctcc  
agtcaacactacaacagaagatgaaacggcacaaattccggctgaagctgtcatcggttact  
cagatttagaaggggatttcgatgttgctgttttgccattttccaacagcacaaataacggg  
ttattgtttataaataactactattgccagcattgctgctaagaagaaggggtatctctcga  
gaagagagggtggtTATTGCGTTGGTCAGCTGTGGCATtgtaggagggattctgattgccctg  
gcgcctgcatttgcaggggaaatggctactgtggatcagggttcagacggacttccacatcac  
caccatcatcaccatcactga

## 5. pCfB2337-Aga2-protease cleavage site (pCfB2337 backbone)

- Aga2 in blue
- GS linker in yellow
- Protease cleavage site in green
- HA tag in violet

>CDS (amino acid sequence)

MQLLRCSFISVIAVLAEQLTTICEQIPSPLESTPYSLSLSTTTILANGKAMQGVFEYYKSV  
TFVSNCGSHPSTTSKGSPIINTQYVFGSGGSSGGSGSGGSSGGSSGGSSGGGLYAARLYAV  
GGSGGSYPYDVPDYASL\*

>5' to 3' DNA sequence

(TEF1 promoter Aga2 GS linker Protease cleavage site GS linker HA Tag)

ccacacaccatagcttcaaaatgtttctactccttttttactccttccagattttctcggact  
ccgcgcacatcgccgtaccacttcaaaacacccaagcacagcataactaaatttccccctctttct  
tcctctaggggtgtcgttaattacccgtactaaagggttggaagaaaaaagagaccgcctc  
gtttctttttcttcgtcgaaaaaggcaataaaaatttttatcacgtttctttttcttgaaaa  
tttttttttttgatttttttctcttttcgatgacctccattgatatttaagttaataaacgg  
tcttcaatttctcaagtttcagtttcatttttcttggtctattacaactttttttacttctt  
gctcattagaaagaaagcatagcaatctaataagATGCAACTGTTGAGGTGCTTCTCTAT  
ATTCAGTGTGATCGCATCAGTCTTAGCTCAAGAGTTGACAACTATTTGCGAACAAATTCCGA  
GCCCACACTTGAGTCTACCCCGTATTCCTTGAGCACAACGACTATTCTGGCTAACGGGAAA  
GCCATGCAAGGGGTGTTTGAATACTACAAGTCCGTGACATTCGTGTCAAAGTGTGGAAGTCA  
CCCAAGTACAACGAGTAAGGGTTCTCCCATTAATACTCAATATGTTTTTGGATCCGGCGGGT  
CATCTGGTGGCTCTGGTTCAGGCGGAGGTAGTGGAAGTGGCGGCGGCTCATCAGGTAGCGGC  
GGAGGCGGTTTATATGCCGCAAGGCTATATGCAGTTGGCGGTAGCGGCGGCTCCTATCCTTA  
CGATGTTCCAGATTATGCGAGCCTGTAA

### Supplementary Reference

- 1 R. C. Prins and S. Billerbeck, *BMC Microbiol.*, 2021, **21**, 1-9.
